# Supplementary material for: Inserting AgCl@rGO into graphene hydrogel 3D structure: synergy of adsorption and photocatalysis for efficient removal of bisphenol A
Source: Royal Society of Chemistry journal article supplement (doi:10.1039/c7ra06126a), 2017-01-01
Supplement: c7ra06126a1.pdf [file c7ra06126a1.pdf]

## Supporting Information

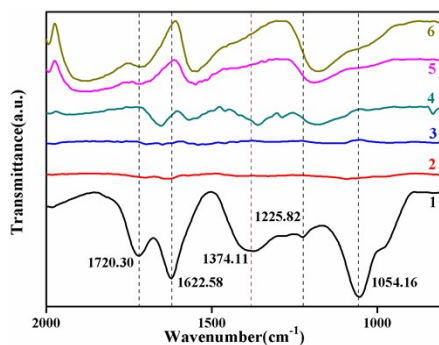

Fig. S1. FTIR Spectra of GO(1), rGH(2), Ag@AgCl(3), AgCl-rGH(4), AgCl@rGO-rGH-1(5), AgCl@rGO-rGH-2(6).

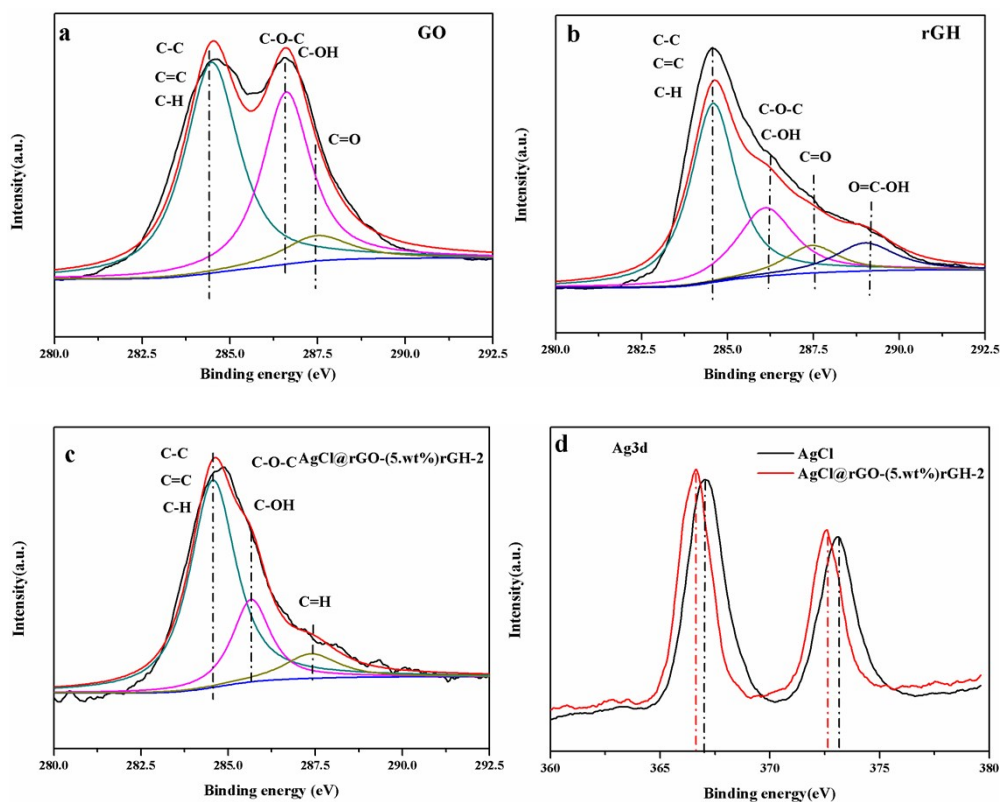

Fig. S2. XPS spectra of C1s in the a: GO, b: rGH and c: AgCl@rGO-(5.wt%)rGH-2; d: Ag3d of AgCl and AgCl@rGO-(5.wt%)rGH-2.

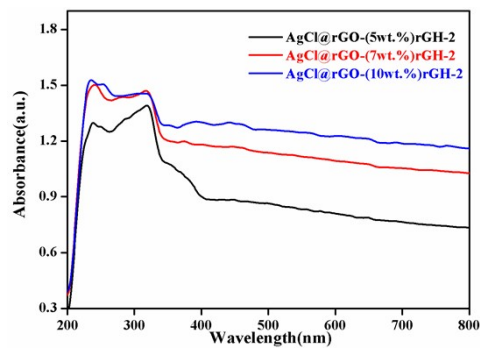

Fig. S3. Uv-vis diffuse reflectance spectra of different ratio of AgCl@rGO-rGH-2

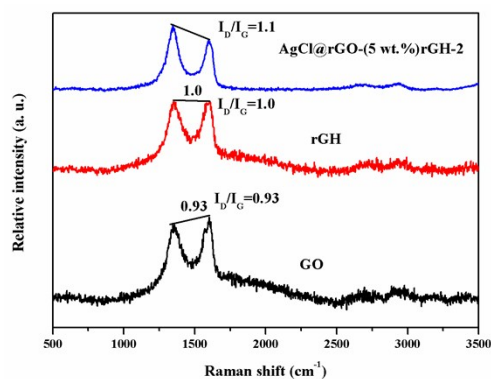

Fig.S4. Raman spectra of the AgCl@rGO-(5 wt.%)rGH-2, GO and rGH.

$$L_a(\text{nm}) = (2.4 \times 10^{-10}) * \lambda^4 / (I_D/I_G) \quad (\lambda \text{ is the Raman excitation wavelength}(524\text{nm in this paper})) \quad \text{Eq. S1.}$$

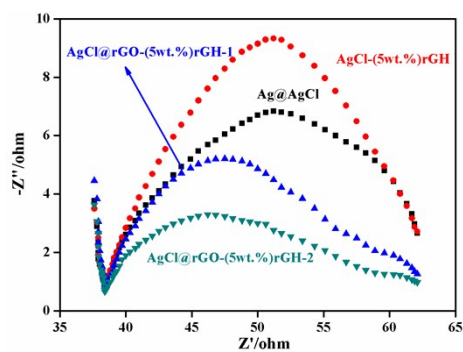

Fig. S5. EIS of different materials in visible light condition

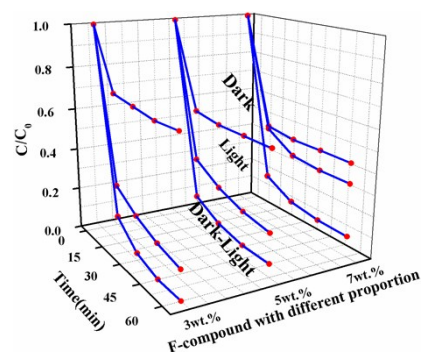

Fig. S6. The photocatalytic degradation, adsorption and photocatalytic degradation together with adsorption cooperative capability of BPA(10ppm,100ml) with different proportion of rGH about AgCl@rGO-rGH-2 (0.1g)
